# Supplementary material for: Comparison of machine learning methods to predict udder health status based on somatic cell counts in dairy cows
Source: PubMed Central journal article supplement (PMC8249463; doi:10.1038/s41598-021-93056-4), 2021-07-01
Supplement: 41598_2021_93056_MOESM1_ESM.pdf [file 41598_2021_93056_MOESM1_ESM.pdf]

## Comparison of machine learning methods to predict udder health status based on somatic cell counts in dairy cows

Tania Bobbo<sup>1,\*</sup>, Stefano Biffani<sup>2</sup>, Cristian Taccioli<sup>3</sup>, Mauro Penasa<sup>1</sup>, and Martino Cassandro<sup>1</sup>

<sup>1</sup>Department of Agronomy, Food, Natural resources, Animals and Environment (DAFNAE), University of Padova, Viale dell'Università 16, 35020 Legnaro (PD), Italy

<sup>2</sup>Istituto di Biologia e Biotecnologia Agraria, Consiglio Nazionale delle Ricerche, Via Edoardo Bassini 15, 20133 Milano, Italy

<sup>3</sup>Department of Animal Medicine, Production and Health (MAPS), University of Padova, Viale dell'Università 16, 35020 Legnaro (PD), Italy

**Supplementary Information file.** Parameters set for some of the algorithms used in this study.

### Naïve Bayes (NB)

Resampling results across tuning parameters:

| usekernel | Accuracy  | Kappa      |
|-----------|-----------|------------|
| FALSE     | 0.7631081 | 0.43359359 |
| TRUE      | 0.7267707 | 0.09699593 |

Tuning parameter 'fL' was held constant at a value of 0.

Tuning parameter 'adjust' was held constant at a value of 1.

Accuracy was used to select the optimal model using the largest value.

The final values used for the model were fL = 0, usekernel = FALSE and adjust = 1.

### Classification and Regression Trees (CART)

Resampling results across tuning parameters:

| cp         | Accuracy  | Kappa     |
|------------|-----------|-----------|
| 0.01212687 | 0.7947766 | 0.4914436 |
| 0.01282649 | 0.7929237 | 0.4954891 |
| 0.28568097 | 0.7473059 | 0.2495228 |

Accuracy was used to select the optimal model using the largest value.

The final value used for the model was cp = 0.01212687.

### k-Nearest Neighbors (kNN)

Resampling results across tuning parameters:

| k | Accuracy  | Kappa     |
|---|-----------|-----------|
| 5 | 0.7552525 | 0.3538142 |
| 7 | 0.7606182 | 0.3579216 |
| 9 | 0.7655360 | 0.3621878 |

Accuracy was used to select the optimal model using the largest value.

The final value used for the model was k = 9.

### Support Vector Machines (SVM)

Resampling results across tuning parameters:

| C    | Accuracy  | Kappa     |
|------|-----------|-----------|
| 0.25 | 0.8009516 | 0.4692618 |
| 0.50 | 0.8001465 | 0.4637676 |
| 1.00 | 0.7984143 | 0.4581571 |

Tuning parameter 'sigma' was held constant at a value of 0.02104279.  
Accuracy was used to select the optimal model using the largest value.  
The final values used for the model were sigma = 0.02104279 and C = 0.25.

### **Random Forest (RF)**

Resampling results across tuning parameters:

| mtry | Accuracy  | Kappa     |
|------|-----------|-----------|
| 2    | 0.7953448 | 0.4472602 |
| 15   | 0.7999865 | 0.4920187 |
| 28   | 0.7973034 | 0.4853928 |

Accuracy was used to select the optimal model using the largest value.  
The final value used for the model was mtry = 15.  
The “rf” method in the Caret package sets the default number of trees at 500.

### **Neural Network (NN)**

Resampling results across tuning parameters:

| size | decay | Accuracy  | Kappa     |
|------|-------|-----------|-----------|
| 1    | 0e+00 | 0.8033859 | 0.5000201 |
| 1    | 1e-04 | 0.8036190 | 0.5007532 |
| 1    | 1e-01 | 0.8044614 | 0.5028761 |
| 3    | 0e+00 | 0.8033283 | 0.4981121 |
| 3    | 1e-04 | 0.8033649 | 0.4987079 |
| 3    | 1e-01 | 0.8047149 | 0.5017679 |
| 5    | 0e+00 | 0.8014789 | 0.4946348 |
| 5    | 1e-04 | 0.8012905 | 0.4940170 |
| 5    | 1e-01 | 0.8027761 | 0.4976747 |

Accuracy was used to select the optimal model using the largest value.  
The final values used for the model were size = 3 and decay = 0.1.
